# Supplementary material for: In Vitro Gene Expression Responses of Bovine Rumen Epithelial Cells to Different pH Stresses
Source: MDPI journal article supplement (doi:10.3390/ani12192621), 2022-09-29
Supplement: s1 [file s1]

**Table S1** Primers used in quantitative real-time PCR

| Gene   | Pri<br>mer | Forward primer (5'-3') | Length (bp) | GeneBank ID    |
|--------|------------|------------------------|-------------|----------------|
| ZNF750 | F          | GGTATCTCCGAAAAGCCTCG   | 131         | NM_001081533.1 |
|        | R          | CCTCTGGTTTCGTGGACAGG   |             |                |
| STC2   | F          | CCTTGCAGAACACAGCGGAA   | 104         | NM_001192745.3 |
|        | R          | GCCCCGAATCTCACAAGAGT   |             |                |
| OAS1Y  | F          | CAAATAGCTGGGAGCGGCTT   | 116         | NM_001040606.1 |
|        | R          | ACTGTGTTCTTGGGGCGACA   |             |                |
| RAB7B  | F          | GGCTCTGATGGTTGTGTCCT   | 168         | XM_024976353.1 |
|        | R          | GCTTCGATACTGCCGGTCTT   |             |                |
| HSPA1A | F          | GTGCAGGAGGCGGAAAAGTA   | 100         | NM_203322.3    |
|        | R          | GGAAATCACCTCCTGGCACT   |             |                |
| TMF1   | F          | AGAAAAGGAGCGGAAACCGT   | 199         | NM_001206260.1 |
|        | R          | TGATCCCGCTCCCATCCTTA   |             |                |
| GAPDH  | F          | CGATGCCCCCATGTTTGTA    | 149         | NM_001034034.2 |
|        | R          | CATGAGCCCCTCCACAATG    |             |                |

Notes: F and R refer to the forward and reverse primers, respectively.
