# Supplementary material for: In Vitro Gene Expression Responses of Bovine Rumen Epithelial Cells to Different pH Stresses
Source: MDPI journal article supplement (doi:10.3390/ani12192621), 2022-09-29
Supplement: s1 [file s1]

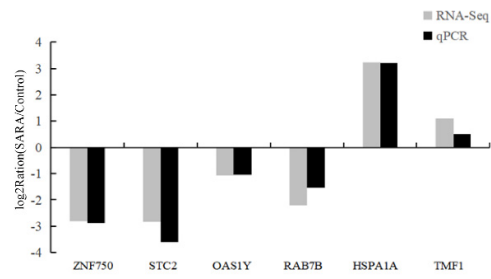

**Figure S1.** Validation of RNA-Seq results by RT-qPCR. Comparison of RT-qPCR findings to RNA-Seq results. Validation of differentially expressed genes by RT-qPCR. Relative quantification of 6 representative genes was performed. RT-qPCR values were determined from the  $\Delta\Delta$  Ct for the target genes.

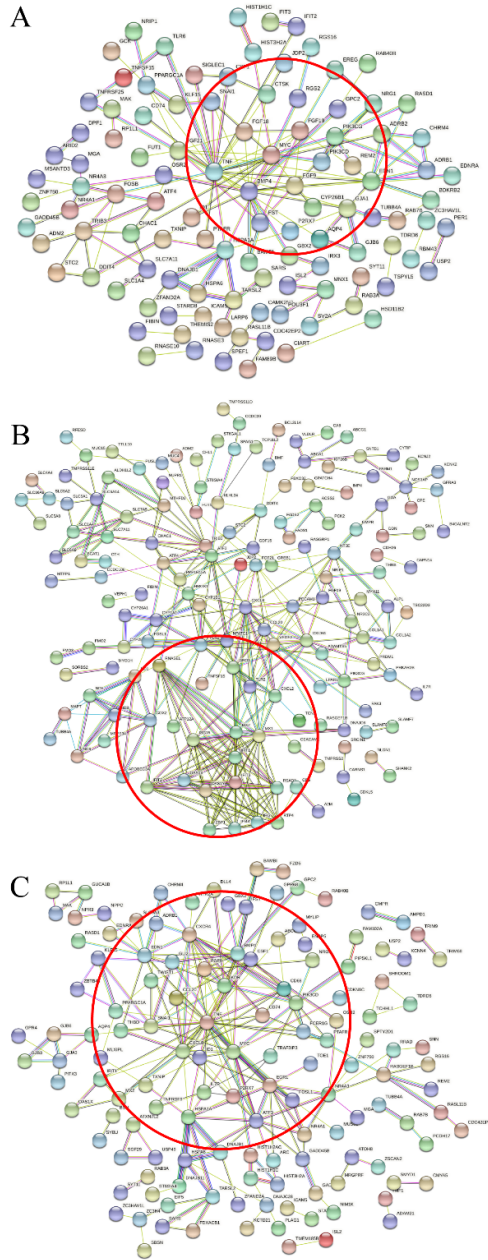

**Figure S2.** Protein-protein interaction (PPI) networks of DEGs significantly enriched pathways associated with BRECs function at different pH. Protein-protein interaction (PPI) networks in the comparison of “Control vs. SARA” (A) “Control vs. ARA” (B) and “SARA vs. ARA” (C). Various color lines represent seven types of evidence used in predicting associations. Red line: fusion evidence; blue line: co-occurrence evidence; yellow line: text mining evidence; green line: neighborhood evidence; purple line: experimental evidence; light blue line: database evidence; and the black line: co-expression evidence.
